# Supplementary material
Source: PubMed Central journal article supplement (PMC5401994)
Supplement: Table1.pdf [file Table1.pdf]

**Table 1.** Distribution of IBAT-sensory (H129) and IWAT-sympathetic (PRV152) neurons in the brain

|                | H129<br>neurons (%)  | PRV152<br>neurons (%) | H129+PRV152<br>neurons (%)                        | Total         |
|----------------|----------------------|-----------------------|---------------------------------------------------|---------------|
| <b>Medulla</b> |                      |                       |                                                   |               |
| 10N            | 5.83±2.27 (14.89)    | 5.00±1.65 (13.74)     | 19.50±4.88* <sup>#</sup> (71.37* <sup>#</sup> )   | 30.33±8.56    |
| 12n            | 5.33±2.47 (13.02)    | 3.00±1.50 (4.48)      | 16.67±6.98 (82.50)                                | 25.00±10.94   |
| 7N             | 12.17±3.79 (14.82)   | 16.17±3.95 (19.06)    | 62.83±18.63* <sup>#</sup> (66.12* <sup>#</sup> )  | 91.17±25.35   |
| AP             | 29.33±8.79 (16.75)   | 27.33±6.62 (16.16)    | 116.00±31.15* <sup>#</sup> (67.09* <sup>#</sup> ) | 172.67±45.99  |
| DPGi           | 3.60±1.06 (9.70)     | 4.40±0.84 (12.72)     | 27.40±5.81* <sup>#</sup> (77.58* <sup>#</sup> )   | 35.40±7.53    |
| Gi             | 80.67±21.16 (13.95)  | 71.33±13.70 (12.85)   | 393.83±54.55* <sup>#</sup> (73.20* <sup>#</sup> ) | 545.83±85.99  |
| GiA            | 19.50±7.15 (12.26)   | 19.67±4.72 (13.03)    | 118.83±27.27* <sup>#</sup> (74.71* <sup>#</sup> ) | 158.00±37.08  |
| GiV            | 12.00±3.22 (22.80)   | 10.50±3.44 (9.88)     | 62.75±20.97* <sup>#</sup> (67.32* <sup>#</sup> )  | 85.25±27.06   |
| IOBe           | 1.00±0.50 (2.00)     | 3.33±1.31 (18.67)     | 16.00±6.28 (79.33)                                | 20.33±8.04    |
| IOC            | 1.50±0.50 (10.00)    | 3.50±0.75 (43.33)     | 5.50±1.47 (46.67)                                 | 10.50±2.50    |
| IOD            | 6.50±1.51 (25.00)    | 10.50±2.94 (27.27)    | 21.50±6.40 (47.73)                                | 38.50±10.78   |
| IOPr           | 6.67±1.82 (26.61)    | 4.00±1.03 (16.21)     | 16.67±4.80 (57.18)                                | 27.33±6.50    |
| IRt            | 93.33±22.11 (16.54)  | 83.17±14.65 (15.30)   | 367.00±51.16* <sup>#</sup> (68.16* <sup>#</sup> ) | 543.50±81.41  |
| LPGi           | 77.00±19.89 (30.22)  | 25.83±5.22* (10.54*)  | 150.00±28.40* <sup>#</sup> (59.24* <sup>#</sup> ) | 252.83±50.48  |
| LRt            | 37.00±15.68 (13.32)  | 36.67±10.46 (15.07)   | 180.17±58.42* <sup>#</sup> (71.61* <sup>#</sup> ) | 253.83±82.78  |
| LRtPC          | 2.33±0.75 (14.16)    | 1.67±0.54 (10.03)     | 7.67±2.17 (75.81)                                 | 11.67±3.45    |
| MdD            | 52.00±15.89 (16.25)  | 41.00±8.16 (13.29)    | 211.50±31.47* <sup>#</sup> (70.46* <sup>#</sup> ) | 304.50±44.51  |
| MdV            | 30.50±11.82 (14.73)  | 26.67±7.50 (14.17)    | 122.50±19.09* <sup>#</sup> (71.10* <sup>#</sup> ) | 179.67±31.26  |
| MVeMC          | 5.00±1.93 (21.41)    | 2.67±1.33 (11.76)     | 11.83±4.28 (66.83* <sup>#</sup> )                 | 19.50±7.33    |
| MVePC          | 5.50±1.28 (18.51)    | 3.67±0.95 (11.35)     | 20.00±2.68* <sup>#</sup> (70.14* <sup>#</sup> )   | 29.17±4.33    |
| PCRt           | 18.33±4.50 (20.74)   | 11.17±3.04 (12.00*)   | 56.33±11.74* <sup>#</sup> (67.26* <sup>#</sup> )  | 85.83±18.79   |
| PCRtA          | 15.67±2.73 (19.77)   | 11.00±2.14 (13.56)    | 56.00±10.79* <sup>#</sup> (66.67* <sup>#</sup> )  | 82.67±14.96   |
| PMn            | 24.67±4.50 (13.58)   | 26.00±3.72 (14.77)    | 128.00±13.33* <sup>#</sup> (71.65* <sup>#</sup> ) | 178.67±17.09  |
| Pr             | 8.83±3.65 (18.40)    | 5.67±1.54 (14.48)     | 23.83±3.89* <sup>#</sup> (67.12* <sup>#</sup> )   | 38.33±8.83    |
| PSol           | 1.00±0.21 (12.14)    | 1.00±0.33 (10.00)     | 6.50±1.38 (77.86)                                 | 8.50±1.83     |
| RMg            | 20.83±2.21 (15.12)   | 25.50±3.18 (17.77)    | 104.17±22.69* <sup>#</sup> (67.11* <sup>#</sup> ) | 150.50±26.09  |
| ROb            | 9.83±2.09 (11.54)    | 13.33±1.76 (15.89)    | 60.00±5.76* <sup>#</sup> (72.57* <sup>#</sup> )   | 83.17±8.59    |
| RPa            | 37.50±4.34 (18.69)   | 36.50±2.87 (18.27)    | 126.33±9.19* <sup>#</sup> (63.04* <sup>#</sup> )  | 200.33±12.53  |
| RVL            | 26.50±7.72 (21.12)   | 22.00±3.88 (18.87)    | 68.17±8.52* <sup>#</sup> (60.01* <sup>#</sup> )   | 116.67±19.12  |
| NTS region     | 176.67±39.85 (17.11) | 185.33±37.18 (18.18)  | 619.67±62.66* <sup>#</sup> (64.71* <sup>#</sup> ) | 981.67±131.19 |
| SolC           | 13.83±3.63 (17.84)   | 16.33±3.99 (20.20)    | 44.67±5.83* <sup>#</sup> (61.96* <sup>#</sup> )   | 74.83±12.46   |
| SolCe          | 5.67±1.65 (15.49)    | 6.83±2.18 (17.28)     | 27.33±8.21* <sup>#</sup> (67.23* <sup>#</sup> )   | 39.83±11.19   |
| SolDL          | 21.67±6.03 (17.11)   | 27.17±7.47 (21.26)    | 71.50±11.92* <sup>#</sup> (61.63* <sup>#</sup> )  | 120.33±24.29  |
| SolDM          | 6.67±2.35 (12.11)    | 5.33±1.76 (10.28)     | 24.67±8.21 (77.61)                                | 36.67±12.30   |
| SolG           | 19.40±6.18 (17.77)   | 21.00±5.34 (20.24)    | 61.20±13.17* <sup>#</sup> (61.99* <sup>#</sup> )  | 101.60±23.57  |
| SolI           | 3.00±1.21 (12.60)    | 3.83±1.38 (16.84)     | 15.83±4.54* <sup>#</sup> (70.56* <sup>#</sup> )   | 22.67±6.89    |
| SolIM          | 31.50±10.52 (17.66)  | 31.17±9.02 (17.67)    | 102.67±23.34* <sup>#</sup> (64.67* <sup>#</sup> ) | 165.33±41.04  |

|                 |                      |                     |                                                   |               |
|-----------------|----------------------|---------------------|---------------------------------------------------|---------------|
| SolM            | 51.00±10.63 (17.50)  | 48.67±8.73 (17.26)  | 177.67±25.58* <sup>#</sup> (65.24* <sup>#</sup> ) | 277.33±41.89  |
| SolV            | 12.33±3.41 (19.53)   | 12.33±3.18 (17.55)  | 41.67±8.32* <sup>#</sup> (62.92* <sup>#</sup> )   | 66.33±13.88   |
| SolVL           | 18.17±3.50 (15.93)   | 18.83±3.81 (16.36)  | 75.00±7.83* <sup>#</sup> (67.71* <sup>#</sup> )   | 112.00±11.54  |
| sp5             | 1.00±0.42 (7.94)     | 0.75±0.34 (5.44)    | 6.75±2.05 (86.62* <sup>#</sup> )                  | 8.50±2.74     |
| Sp5C            | 10.80±3.98 (20.20)   | 9.20±3.37 (16.90)   | 32.60±11.30 (62.90* <sup>#</sup> )                | 52.60±18.32   |
| Sp5I            | 0.50±0.17 (7.14)     | 0.00±0.00 (0.00)    | 4.00±0.99 (92.86)                                 | 4.50±1.15     |
| Sp5O            | 1.50±0.45 (23.61)    | 0.00±0.00 (0.00)    | 4.50±1.32 (76.39* <sup>#</sup> )                  | 6.00±1.69     |
| SpVe            | 1.00±0.49 (20.00)    | 0.00±0.00 (0.00)    | 3.00±0.73 (80.00* <sup>#</sup> )                  | 4.00±0.95     |
| vsc             | 129.50±33.05 (26.68) | 72.67±9.87 (16.17*) | 254.83±31.48* <sup>#</sup> (57.15* <sup>#</sup> ) | 457.00±72.52  |
| <b>Pons</b>     |                      |                     |                                                   |               |
| A5              | 29.25±7.27 (24.20)   | 21.75±5.33 (18.25)  | 67.00±15.37 (57.55)                               | 118.00±27.38  |
| CGPn            | 3.50±1.18 (27.01)    | 2.33±0.99 (15.92)   | 7.00±1.71 (57.07* <sup>#</sup> )                  | 12.83±3.46    |
| DMTg            | 22.00±5.44 (23.50)   | 15.00±3.64 (16.36)  | 55.50±13.55 (60.14)                               | 92.50±22.63   |
| LC              | 51.00±12.37 (24.10)  | 31.00±7.31 (14.60*) | 133.00±32.07* <sup>#</sup> (61.30* <sup>#</sup> ) | 215.00±49.32  |
| LDTg            | 27.80±8.17 (23.37)   | 21.40±5.84 (15.77)  | 83.60±26.36 (60.86* <sup>#</sup> )                | 132.80±37.74  |
| LPBC            | 8.80±2.73 (30.55)    | 5.60±2.29 (13.74)   | 19.60±6.90 (55.71* <sup>#</sup> )                 | 34.00±11.49   |
| LPBD            | 6.80±3.37 (29.99)    | 4.40±2.22 (11.89)   | 14.80±7.20 (58.12)                                | 26.00±12.71   |
| LPBV            | 0.50±0.17 (8.33)     | 1.50±0.34 (25.00)   | 4.00±0.88 (66.67)                                 | 6.00±1.26     |
| mlf             | 6.33±2.60 (16.44)    | 5.83±1.22 (17.85)   | 21.17±3.97* <sup>#</sup> (65.71* <sup>#</sup> )   | 33.33±6.85    |
| Mo5             | 5.50±1.33 (27.50)    | 5.00±1.31 (22.50)   | 10.50±2.63 (50.00)                                | 21.00±5.26    |
| MPB             | 8.20±4.54 (32.77)    | 5.60±2.75 (14.78)   | 14.40±6.38 (52.45* <sup>#</sup> )                 | 28.20±13.38   |
| PnC             | 21.33±10.14 (12.81)  | 25.33±11.90 (17.05) | 101.17±44.90 (70.14* <sup>#</sup> )               | 147.83±66.82  |
| PnO             | 22.83±4.28 (15.21)   | 24.33±3.87 (16.40)  | 117.83±40.29* <sup>#</sup> (68.39* <sup>#</sup> ) | 165.00±47.19  |
| PPTg            | 4.33±1.11 (16.29)    | 4.33±1.01 (16.24)   | 21.67±5.71 (67.47)                                | 30.33±7.25    |
| Pr5             | 10.67±2.94 (29.72)   | 7.00±1.71 (20.13)   | 18.67±5.04 (50.15)                                | 36.33±9.02    |
| rs              | 7.00±1.67 (23.63)    | 5.00±1.09 (17.38)   | 16.50±3.48 (58.99)                                | 28.50±6.08    |
| SubCD           | 11.00±2.55 (25.95)   | 9.75±2.35 (22.65)   | 23.50±5.95 (51.40* <sup>#</sup> )                 | 44.25±10.77   |
| SubCV           | 10.00±2.42 (15.64)   | 10.00±2.87 (14.89)  | 50.50±14.36 (69.47* <sup>#</sup> )                | 70.50±18.78   |
| <b>Midbrain</b> |                      |                     |                                                   |               |
| 3PC             | 2.00±1.33 (3.77)     | 2.75±1.47 (9.25)    | 12.25±5.71 (86.98* <sup>#</sup> )                 | 17.00±8.48    |
| CnF             | 10.33±3.36 (14.72)   | 9.33±2.86 (13.59)   | 50.67±14.78 (71.69)                               | 70.33±20.74   |
| DpMe            | 22.50±7.11 (10.78)   | 31.17±11.09 (14.06) | 151.17±48.84* <sup>#</sup> (75.16* <sup>#</sup> ) | 204.83±66.81  |
| DRD             | 1.25±0.54 (7.50)     | 1.75±0.65 (21.67)   | 6.50±2.64 (70.83*)                                | 9.50±3.60     |
| DRI             | 1.75±0.83 (9.58)     | 1.75±0.60 (10.89)   | 8.50±2.39 (79.53* <sup>#</sup> )                  | 12.00±3.59    |
| ml              | 4.80±1.15 (22.23)    | 3.40±0.70 (15.59)   | 13.60±2.55* <sup>#</sup> (62.18* <sup>#</sup> )   | 21.80±3.70    |
| PAG region      | 60.83±19.34 (12.20)  | 70.50±16.08 (15.08) | 339.17±76.85* <sup>#</sup> (72.72* <sup>#</sup> ) | 470.50±111.02 |
| DLPAG           | 2.33±1.05 (10.36)    | 2.33±0.99 (9.13)    | 14.83±4.71* <sup>#</sup> (80.51* <sup>#</sup> )   | 19.50±6.65    |
| DMPAG           | 14.67±6.30 (13.14)   | 15.50±4.96 (15.58)  | 70.67±21.80* <sup>#</sup> (71.28* <sup>#</sup> )  | 100.83±32.40  |
| LPAG            | 30.00±10.69 (11.56)  | 36.17±9.09 (15.13)  | 173.00±42.19* <sup>#</sup> (73.31* <sup>#</sup> ) | 239.17±61.04  |
| PAG             | 6.50±2.05 (10.47)    | 8.17±1.78 (14.13)   | 42.67±7.94* <sup>#</sup> (75.40* <sup>#</sup> )   | 57.33±11.53   |
| VLPAG           | 8.80±1.96 (14.94)    | 10.00±1.89 (17.42)  | 45.60±10.82* <sup>#</sup> (67.64* <sup>#</sup> )  | 64.40±13.87   |
| PN              | 4.33±1.05 (25.90)    | 3.33±0.76 (19.77)   | 9.33±2.23 (54.33)                                 | 17.00±3.81    |
| R               | 2.00±0.42 (10.80)    | 2.00±0.67 (9.09)    | 15.00±3.17 (80.11)                                | 19.00±4.08    |

|                        |                     |                     |                                                   |              |
|------------------------|---------------------|---------------------|---------------------------------------------------|--------------|
| Su3                    | 6.40±1.78 (16.54)   | 7.80±2.03 (20.10)   | 26.20±8.13 (63.36* <sup>#</sup> )                 | 40.40±11.83  |
| Su3C                   | 5.17±1.54 (12.99)   | 6.67±1.89 (16.68)   | 23.17±7.46* <sup>#</sup> (70.33* <sup>#</sup> )   | 35.00±10.83  |
| VTA                    | 16.00±7.59 (13.43)  | 13.00±4.71 (16.71)  | 54.80±20.89* <sup>#</sup> (69.86* <sup>#</sup> )  | 83.80±32.97  |
| <b>Forebrain</b>       |                     |                     |                                                   |              |
| <i>Other forebrain</i> |                     |                     |                                                   |              |
| BSTMA                  | 2.50±0.65 (23.57)   | 2.50±0.54 (20.71)   | 7.00±1.67 (55.72)                                 | 12.00±2.58   |
| BSTMV                  | 6.00±2.71 (35.90)   | 3.25±1.08 (28.65)   | 5.25±2.35 (35.45)                                 | 14.50±6.07   |
| BSTMPL                 | 1.50±0.34 (14.65)   | 1.00±0.33 (9.09)    | 7.50±1.59 (76.26)                                 | 10.00±2.12   |
| LSV                    | 1.00±0.40 (8.84)    | 1.40±0.31 (21.17)   | 7.00±1.89* <sup>#</sup> (69.99* <sup>#</sup> )    | 9.40±2.33    |
| VP                     | 2.00±0.68 (12.15)   | 2.33±0.65 (20.48)   | 7.67±2.02 (67.37* <sup>#</sup> )                  | 12.00±3.32   |
| <i>Preoptic area</i>   |                     |                     |                                                   |              |
| AVPe                   | 1.40±0.60 (12.80)   | 1.40±0.48 (13.56)   | 7.20±2.21* <sup>#</sup> (73.64* <sup>#</sup> )    | 10.00±3.20   |
| HDB                    | 2.33±0.76 (10.78)   | 4.33±0.84 (24.65)   | 18.50±9.15 (64.57* <sup>#</sup> )                 | 25.17±10.64  |
| LPO                    | 15.33±4.72 (17.28)  | 13.50±2.68 (17.13)  | 49.33±9.59* <sup>#</sup> (65.59* <sup>#</sup> )   | 78.17±15.35  |
| LSI                    | 8.00±5.89 (12.92)   | 4.60±3.27 (6.66)    | 13.40±6.06 (80.42* <sup>#</sup> )                 | 26.00±14.95  |
| MnPO                   | 3.80±2.20 (11.58)   | 3.00±1.34 (10.26)   | 15.80±6.67 (78.16* <sup>#</sup> )                 | 22.60±10.08  |
| MPOL                   | 5.00±1.41 (19.50)   | 4.75±1.51 (17.73)   | 17.50±5.68 (62.77* <sup>#</sup> )                 | 27.25±8.50   |
| MPOM                   | 13.83±2.21 (13.53)  | 15.83±1.87 (15.84)  | 75.17±13.61* <sup>#</sup> (70.63* <sup>#</sup> )  | 104.83±17.21 |
| SFO                    | 0.00±0.00 (0.00)    | 1.50±0.87 (18.75)   | 3.50±0.87 (81.25)                                 | 5.00±1.73    |
| SI                     | 1.80±0.96 (16.88)   | 2.00±0.61 (21.49)   | 6.80±2.20 (61.63* <sup>#</sup> )                  | 10.60±3.44   |
| VMPO                   | 3.67±0.91 (14.11)   | 4.00±1.18 (13.30)   | 19.00±4.75 (72.59* <sup>#</sup> )                 | 26.67±6.80   |
| VOLT                   | 2.00±0.49 (25.00)   | 2.00±0.49 (25.00)   | 4.00±0.99 (50.00)                                 | 8.00±1.98    |
| <i>Hypothalamus</i>    |                     |                     |                                                   |              |
| AHA                    | 3.25±1.97 (13.23)   | 3.25±1.40 (26.48)   | 7.75±3.43 (60.29*)                                | 14.25±6.77   |
| AHC                    | 1.67±0.56 (20.76)   | 1.50±0.43 (18.02)   | 5.83±1.66* <sup>#</sup> (61.22* <sup>#</sup> )    | 9.00±1.15    |
| AHP                    | 8.17±2.82 (14.30)   | 8.50±2.86 (14.51)   | 34.50±4.88* <sup>#</sup> (71.19* <sup>#</sup> )   | 51.17±10.25  |
| Arc                    | 1.60±0.88 (7.18)    | 2.40±0.77 (14.27)   | 10.40±2.50* <sup>#</sup> (78.55* <sup>#</sup> )   | 14.40±3.94   |
| ArcLP                  | 3.33±1.20 (14.12)   | 3.83±0.79 (18.53)   | 11.33±2.74* <sup>#</sup> (67.35* <sup>#</sup> )   | 18.50±4.46   |
| ArcMP                  | 4.33±1.20 (13.80)   | 4.50±1.06 (14.66)   | 24.00±6.14* <sup>#</sup> (71.54* <sup>#</sup> )   | 32.83±8.12   |
| DM                     | 10.00±2.13 (13.46)  | 12.33±2.44 (15.43)  | 60.67±14.78* <sup>#</sup> (71.11* <sup>#</sup> )  | 83.00±18.25  |
| DMC                    | 1.00±0.33 (8.33)    | 1.50±0.34 (33.33)   | 4.50±1.31 (58.34)                                 | 7.00±1.96    |
| DMD                    | 1.00±0.33 (6.25)    | 2.00±0.49 (26.04)   | 6.50±1.80 (67.71)                                 | 9.50±2.61    |
| DMV                    | 6.50±1.42 (15.55)   | 6.00±1.48 (14.22)   | 29.00±6.16 (70.23)                                | 41.50±8.76   |
| DTM                    | 3.67±0.83 (24.22)   | 4.67±1.33 (20.81)   | 12.00±3.38 (54.97)                                | 20.33±5.46   |
| LA                     | 4.33±3.20 (6.01)    | 7.17±4.24 (21.78*)  | 24.00±13.35 (72.21* <sup>#</sup> )                | 35.50±20.73  |
| LH                     | 46.00±12.47 (13.02) | 49.83±12.68 (14.19) | 259.83±60.00* <sup>#</sup> (72.79* <sup>#</sup> ) | 355.67±82.80 |
| MPA                    | 34.50±8.07 (14.97)  | 40.33±8.48 (17.64*) | 152.67±32.11* <sup>#</sup> (67.39* <sup>#</sup> ) | 227.50±48.48 |
| PVH region             | 66.17±11.85 (16.45) | 80.00±12.39 (20.13) | 254.67±40.92* <sup>#</sup> (63.42* <sup>#</sup> ) | 400.83±63.47 |
| PaAP                   | 3.00±0.82 (24.17)   | 2.00±0.42 (15.00)   | 8.50±2.01 (60.83)                                 | 13.50±2.87   |
| PaLM                   | 9.83±2.30 (16.33)   | 14.17±3.99 (22.13)  | 37.83±8.63* <sup>#</sup> (61.54* <sup>#</sup> )   | 61.83±14.23  |
| PaMM                   | 20.80±5.47 (18.73)  | 25.60±7.55 (21.86)  | 67.60±19.15* <sup>#</sup> (59.41* <sup>#</sup> )  | 114.00±32.09 |
| PaMP                   | 18.00±3.21 (17.33)  | 22.00±2.56 (22.16)  | 64.00±11.85* <sup>#</sup> (60.51* <sup>#</sup> )  | 104.00±16.17 |
| PaPo                   | 17.67±3.36 (14.90)  | 17.67±2.26 (15.86)  | 85.17±14.45* <sup>#</sup> (69.24* <sup>#</sup> )  | 120.50±18.64 |

|                 |                    |                    |                                                  |              |
|-----------------|--------------------|--------------------|--------------------------------------------------|--------------|
| PaV             | 3.50±1.09 (17.88)  | 6.25±2.70 (24.93)  | 12.75±4.66 (57.19)                               | 22.50±8.32   |
| PH              | 9.83±4.01 (12.62)  | 13.50±5.13 (16.14) | 60.17±19.43* <sup>#</sup> (71.24* <sup>#</sup> ) | 83.50±28.23  |
| PMV             | 2.00±0.49 (38.64)  | 1.00±0.33 (9.09)   | 3.50±0.98 (52.27)                                | 6.50±1.80    |
| SCh             | 2.50±0.61 (10.09)  | 6.75±2.19 (22.45)  | 24.00±8.75 (67.46*)                              | 33.25±11.15  |
| SChVL           | 4.00±1.33 (8.16)   | 4.50±1.31 (18.16)  | 18.50±5.41 (73.68)                               | 27.00±8.04   |
| TC              | 18.00±5.98 (14.29) | 19.67±6.42 (15.28) | 84.33±19.76* <sup>#</sup> (70.43* <sup>#</sup> ) | 122.00±31.89 |
| VMHC            | 2.33±1.17 (9.33)   | 1.33±0.67 (5.33)   | 7.67±2.23 (85.34)                                | 11.33±3.97   |
| VMHDM           | 1.50±1.00 (7.89)   | 1.00±0.49 (7.52)   | 6.25±1.60 (84.59* <sup>#</sup> )                 | 8.75±2.89    |
| VMHVL           | 0.67±0.33 (5.13)   | 0.67±0.33 (5.13)   | 4.00±1.44 (89.74)                                | 5.33±2.09    |
| <i>Thalamus</i> |                    |                    |                                                  |              |
| LHbL            | 0.00±0.00 (0.00)   | 0.75±0.34 (12.14)  | 5.00±1.41 (87.86* <sup>#</sup> )                 | 5.75±1.54    |
| PF              | 0.00±0.00 (0.00)   | 0.50±0.17 (5.00)   | 6.50±1.51 (95.00)                                | 7.00±1.67    |
| PrC             | 3.67±1.74 (7.42)   | 4.00±1.75 (12.71)  | 24.67±7.27* <sup>#</sup> (79.87* <sup>#</sup> )  | 32.33±10.59  |
| pv              | 1.50±0.76 (6.08)   | 2.50±0.62 (11.39)  | 16.00±3.84* <sup>#</sup> (82.53* <sup>#</sup> )  | 20.00±4.95   |
| SPF             | 1.50±0.50 (4.41)   | 3.50±0.98 (21.32)  | 14.00±4.10 (74.27)                               | 19.00±5.57   |
| ME              | 3.25±1.80 (11.03)  | 3.00±1.48 (11.03)  | 9.75±2.78 (77.94* <sup>#</sup> )                 | 16.00±5.50   |

Data are expressed as means ± SEM (n=6)

\* $p < 0.05$  vs. H129, <sup>#</sup> $p < 0.05$  vs. PRV152

10N, dorsal motor nucleus of vagus; 12n, root of hypoglossal nerve; 3PC, oculomotor nucleus; 7N, facial nucleus; A5, noradrenaline cells; AHA, anterior hypothalamic area, anterior part; AHC, anterior hypothalamic area, central part; AHP, anterior hypothalamic area, posterior part; AP, area postrema; Arc, arcuate hypothalamic nucleus; ArcLP, arcuate hypothalamic nucleus, lateroposterior part; ArcMP, arcuate hypothalamic nucleus, medial posterior part; AVPe, anteroventral periventricular nucleus; BSTMA, bed nucleus of the stria terminalis, medial division, anterior part; BSTMV, bed nucleus of stria terminalis, medial division, ventral part; BSTMPL, bed nucleus of the stria terminalis, medial division, posterolateral part; CGPn, central gray of the pons; CnF, cuneiform nucleus; DLPAG, dorsolateral periaqueductal gray; DM, dorsomedial hypothalamic nucleus; DMC, dorsomedial hypothalamic nucleus, compact part; DMD, dorsomedial hypothalamic nucleus, dorsal part; DMPAG, dorsomedial periaqueductal gray; DMTg, dorsomedial tegmental area; DMV, dorsomedial hypothalamic nucleus, ventral part; DPGi, dorsal paragigantocellular nucleus; DpMe, deep mesencephalic nucleus; DRD, dorsal raphe nucleus, dorsal part; DRI, dorsal raphe nucleus, interfascicular part; DTM, dorsal tuberomammillary nucleus; Gi, gigantocellular reticular nucleus; GiA, gigantocellular reticular nucleus, alpha part; GiV, gigantocellular reticular nucleus, ventral part; HDB, nucleus of the horizontal limb of the diagonal band; IOBe, inferior olive, beta subnucleus; IOC, inferior olive, subnucleus C of medial nucleus; IOD, inferior olive, dorsal nucleus; IOPr, inferior olive, principal nucleus; IRT, intermediate reticular nucleus; LA, lateroanterior hypothalamic nucleus; LC, locus coeruleus; LDTg, laterodorsal tegmental nucleus; LH, lateral hypothalamic area; LHbL, lateral habenular nucleus, lateral part; LPAG, lateral periaqueductal gray; LPBC, lateral parabrachial nucleus, central part; LPBD, lateral parabrachial nucleus, dorsal part; LPBV, lateral parabrachial nucleus, ventral part; LPGi, lateral paragigantocellular nucleus; LPO, lateral preoptic area; LRt, lateral reticular nucleus; LRtPC, lateral reticular nucleus, parvicellular part; LSI, lateral septal nucleus, intermediate part; LSV, lateral septal nucleus, ventral part; MdD, medullary reticular nucleus, dorsal part; MdV, medullary reticular nucleus, ventral part; ME, median eminence; ml, medial lemniscus; mlf, medial longitudinal fasciculus; MnPO, median preoptic nucleus; Mo5, motor trigeminal nucleus; MPA, medial preoptic area; MPB, medial parabrachial nucleus; MPOL, medial preoptic nucleus, lateral part; MPOM, medial preoptic nucleus, medial part; MVeMC, medial vestibular nucleus, magnocellular part; MVePC, medial vestibular nucleus, parvicellular part; NTS, nucleus of the solitary tract; PaAP, paraventricular hypothalamic nucleus, anterior parvicellular part; PAG, periaqueductal gray; PaLM, paraventricular hypothalamic nucleus, lateral magnocellular part; PaMM, paraventricular hypothalamic nucleus, medial magnocellular part; PaMP, paraventricular hypothalamic nucleus, medial parvicellular part; PaPo, paraventricular hypothalamic nucleus, posterior part; PaV, paraventricular hypothalamic nucleus, ventral part; PCRt, parvicellular reticular nucleus; PCRtA, parvicellular reticular nucleus, alpha part; PF, parafascicular thalamic nucleus; PH, posterior hypothalamic area; PMn, paramedian reticular nucleus; PMV, premammillary nucleus, ventral

part; PN, paranigral nucleus; PnC, pontine reticular nucleus, caudal part; PnO, pontine reticular nucleus, oral part; PPTg, pedunclopontine tegmental nucleus; Pr, prepositus nucleus; Pr5, principal sensory trigeminal nucleus; PrC, precommissural nucleus; PSol, parasolitary nucleus; pv, periventricular fiber system; PVH, paraventricular hypothalamic nucleus; R, red nucleus; RMg, raphe magnus nucleus; ROb, raphe obscurus nucleus; RPa, raphe pallidus nucleus; rs, rubrospinal tract; RVL, rostroventrolateral reticular nucleus; SCh, suprachiasmatic nucleus; SChVL, suprachiasmatic nucleus, ventrolateral part; SFO, subfornical organ; SI, substantia innominata; SolC, nucleus of the solitary tract, commissural part; SolCe, nucleus of the solitary tract, central part; SolDL, solitary nucleus, dorsolateral part; SolDM, nucleus of the solitary tract, dorsomedial part; SolG, nucleus of the solitary tract, gelatinous part; SolI, nucleus of the solitary tract, interstitial part; SolIM, nucleus of the solitary tract, intermediate part; SolM, nucleus of the solitary tract, medial part; SolV, solitary nucleus, ventral part; SolVL, nucleus of the solitary tract, ventrolateral part; sp5, spinal trigeminal tract; Sp5C, spinal trigeminal nucleus, caudal part; Sp5I, spinal trigeminal nucleus, interpolar part; Sp5O, spinal trigeminal nucleus, oral part; SPF, subparafascicular thalamic nucleus; SpVe, spinal vestibular nucleus; Su3, supraoculomotor periaqueductal gray; Su3C, supraoculomotor cap; SubCD, subcoeruleus nucleus, dorsal part; SubCV, subcoeruleus nucleus, ventral part; TC, tuber cinereum area; VLPAG, ventrolateral periaqueductal gray; VMHC, ventromedial hypothalamic nucleus, central part; VMHDM, ventromedial hypothalamic nucleus, dorsomedial part; VMHVL, ventromedial hypothalamic nucleus, ventrolateral part; VMPO, ventromedial preoptic nucleus; VOLT, vascular organ of the lamina terminalis; VP, ventral pallidum; vsc, ventral spinocerebellar tract; VTA, ventral tegmental area
