# Supplementary material
Source: PubMed Central journal article supplement (PMC5401994)
Supplement: Table2.pdf [file Table2.pdf]

**Table 2.** Distribution of IWAT-sensory (H129) and IBAT-sympathetic (PRV152) neurons in the brain

|                | H129<br>neurons (%)               | PRV152<br>neurons (%) | H129+PRV152<br>neurons (%)                     | Total        |
|----------------|-----------------------------------|-----------------------|------------------------------------------------|--------------|
| <b>Medulla</b> |                                   |                       |                                                |              |
| 10N            | 4.00±1.06 (23.34)                 | 5.33±0.99 (31.60)     | 10.00±3.95 (45.06 <sup>#</sup> )               | 19.33±5.48   |
| 12n            | 3.33±1.63 (27.25)                 | 3.33±1.41 (32.54)     | 3.67±1.76 (40.21)                              | 10.33±4.58   |
| 7N             | 19.00±8.74 (20.96)                | 29.33±4.35 (40.12*)   | 26.33±2.28 (38.92*)                            | 74.67±12.16  |
| AP             | 8.50±1.38 (19.54)                 | 12.83±1.87 (29.09)    | 22.50±5.98 (51.37)                             | 43.83±7.21   |
| DPGi           | 8.83±4.11 (21.92)                 | 13.83±2.75 (37.25*)   | 15.83±3.86 (40.83*)                            | 38.50±9.39   |
| Gi             | 66.00±16.35 (27.32)               | 57.83±7.76 (25.33)    | 109.17±17.05 (47.35 <sup>#</sup> )             | 233.00±33.64 |
| GiA            | 33.33±7.21 (31.47)                | 23.67±2.96 (23.16)    | 45.17±4.65 <sup>#</sup> (45.37 <sup>#</sup> )  | 102.17±12.52 |
| GiV            | 8.83±4.13 (26.32)                 | 6.67±3.33 (19.38)     | 19.00±9.28 (54.30)                             | 34.50±16.25  |
| IOBe           | 5.83±1.19 (24.52)                 | 6.67±1.52 (27.82)     | 11.50±2.49 (47.66)                             | 24.00±5.00   |
| IOC            | 1.00±0.63 (12.00)                 | 2.17±0.70 (35.33)     | 2.83±0.91 (52.67*)                             | 6.00±1.84    |
| IOD            | 0.17±0.17 (25.00)                 | 0.33±0.21 (32.14)     | 1.00±1.00 (42.86)                              | 1.50±1.15    |
| IOK            | 3.83±1.47 (22.98)                 | 3.50±1.31 (21.24)     | 5.67±1.67 (55.78)                              | 13.00±4.33   |
| IOM            | 0.33±0.33 (9.46)                  | 0.83±0.54 (23.78)     | 2.33±1.61 (66.76)                              | 3.50±1.82    |
| IOPr           | 4.83±0.83 (23.03)                 | 6.33±1.20 (28.36)     | 11.67±2.67* (48.61 <sup>#</sup> )              | 22.83±4.25   |
| IRt            | 100.83±28.63 (28.02)              | 85.00±14.29 (25.08)   | 158.33±30.74 (46.90 <sup>#</sup> )             | 344.17±56.94 |
| LPGi           | 77.67±15.06 (36.94 <sup>#</sup> ) | 36.67±6.35* (17.46)   | 91.33±8.94 <sup>#</sup> (45.60 <sup>#</sup> )  | 205.67±26.72 |
| LRt            | 22.00±4.25 (22.44)                | 24.33±3.14 (26.72)    | 49.67±10.84 <sup>#</sup> (50.84 <sup>#</sup> ) | 96.00±16.50  |
| LRtPC          | 0.50±0.50 (25.00)                 | 0.67±0.67 (33.33)     | 0.83±0.83 (41.67)                              | 2.00±2.00    |
| MdD            | 33.67±5.33 (23.97)                | 31.67±4.40 (22.40)    | 78.83±14.73 <sup>#</sup> (53.63 <sup>#</sup> ) | 144.17±21.57 |
| MdV            | 31.50±3.99 (26.29)                | 29.83±2.73 (25.33)    | 61.67±12.90 <sup>#</sup> (48.38 <sup>#</sup> ) | 123.00±14.31 |
| MVeMC          | 0.17±0.17 (20.00)                 | 0.17±0.17 (20.00)     | 0.50±0.50 (60.00)                              | 0.83±0.83    |
| MVePC          | 3.33±1.78 (22.08)                 | 3.83±0.95 (30.25)     | 5.83±1.40 (47.67*)                             | 13.00±3.40   |
| PCRt           | 8.67±2.59 (19.46)                 | 9.17±3.44 (14.78)     | 23.67±7.24 (65.76 <sup>#</sup> )               | 41.50±10.54  |
| PCRtA          | 22.00±11.57 (34.14)               | 17.17±7.95 (27.73)    | 21.50±8.89 (38.13)                             | 60.67±25.24  |
| PMn            | 31.17±5.99 (25.47)                | 29.33±4.30 (23.75)    | 63.00±10.75 <sup>#</sup> (50.78 <sup>#</sup> ) | 123.50±15.98 |
| Pr             | 9.17±5.41 (19.10)                 | 12.17±2.27 (35.57)    | 14.00±1.67 (45.33*)                            | 35.33±7.60   |
| PSol           | 1.17±0.65 (21.43)                 | 1.33±0.80 (22.86)     | 1.83±0.79 (55.71)                              | 4.33±2.17    |
| RMg            | 38.83±5.92 (37.01)                | 28.00±3.28 (26.41)    | 38.83±4.55 (36.58)                             | 105.67±13.27 |
| ROb            | 21.83±4.57 (30.26)                | 20.17±3.15 (29.01)    | 27.83±3.74 (40.73 <sup>#</sup> )               | 69.83±10.74  |
| RPa            | 40.67±5.11 (21.85)                | 46.67±2.70 (25.14)    | 98.33±6.86 <sup>#</sup> (53.01 <sup>#</sup> )  | 185.67±10.68 |
| RVL            | 15.50±3.70 (24.97)                | 16.00±2.82 (27.37)    | 26.33±4.36 (47.66 <sup>#</sup> )               | 57.83±8.91   |
| NTS region     | 98.00±17.29 (22.39)               | 145.00±21.42 (31.93)  | 209.33±39.79* (45.68 <sup>#</sup> )            | 452.33±54.07 |
| SolC           | 12.67±2.64 (26.06)                | 16.33±2.93 (32.56)    | 20.33±4.31 (41.38)                             | 49.33±6.54   |
| SolCe          | 1.83±0.79 (10.02)                 | 3.33±0.95 (21.58)     | 5.33±1.96 (68.40)                              | 10.50±2.88   |
| SolDL          | 12.00±3.47 (18.83)                | 21.17±3.60 (35.27)    | 27.17±4.81 (45.90)                             | 60.33±9.16   |
| SolDM          | 0.00±0.00 (0.00)                  | 0.00±0.00 (0.00)      | 0.00±0.00 (0.00)                               | 0.00±0.00    |
| SolG           | 10.00±1.63 (20.46)                | 18.00±1.91 (35.67)    | 23.67±4.77* (43.87*)                           | 51.67±5.83   |

|                 |                                 |                     |                                                   |              |
|-----------------|---------------------------------|---------------------|---------------------------------------------------|--------------|
| SolI            | 3.00±0.26 (29.97)               | 4.17±0.95 (35.54)   | 4.50±1.48 (34.49)                                 | 11.67±2.40   |
| SolIM           | 11.50±3.33 (12.63)              | 18.00±3.64 (18.75)  | 30.17±9.24 (68.62)                                | 59.67±13.42  |
| SolM            | 20.17±3.78 (22.56)              | 28.50±5.33 (30.74)  | 43.50±8.79 (46.70)                                | 92.17±10.51  |
| SolV            | 11.67±1.98 (23.19)              | 15.67±3.57 (29.49)  | 23.83±3.52* (47.32*)                              | 51.17±7.03   |
| SolVL           | 15.17±2.80 (23.19)              | 19.83±2.89 (29.51)  | 30.83±4.45* (47.30*)                              | 65.83±6.82   |
| sp5             | 0.17±0.17 (20.00)               | 0.17±0.17 (20.00)   | 0.50±0.50 (60.00)                                 | 0.83±0.83    |
| Sp5C            | 6.33±3.23 (22.69)               | 6.00±3.08 (20.28)   | 12.83±5.17 (57.03* <sup>#</sup> )                 | 25.17±11.29  |
| Sp5I            | 1.17±0.65 (51.11)               | 0.50±0.34 (24.44)   | 0.67±0.42 (24.45)                                 | 2.33±1.12    |
| Sp5O            | 0.67±0.49 (21.14)               | 0.67±0.33 (21.13)   | 1.83±0.70 (57.73)                                 | 3.17±1.25    |
| SpVe            | 0.17±0.17 (7.83)                | 0.83±0.48 (38.25)   | 1.17±0.48 (53.92)                                 | 2.17±1.08    |
| vsc             | 56.83±8.98 (25.35)              | 60.67±7.13 (27.16)  | 109.67±16.37* <sup>#</sup> (47.49* <sup>#</sup> ) | 227.17±28.51 |
| <b>Pons</b>     |                                 |                     |                                                   |              |
| A5              | 18.17±2.21 (25.79)              | 23.00±3.41 (31.30)  | 31.33±4.68 (42.91* <sup>#</sup> )                 | 72.50±8.95   |
| CGPn            | 4.50±2.59 (32.86)               | 3.67±1.76 (31.07)   | 3.33±1.15 (36.07)                                 | 11.50±5.12   |
| DMTg            | 4.50±1.69 (30.70)               | 4.33±1.17 (29.54)   | 5.83±1.70 (39.76)                                 | 14.67±4.42   |
| DRVL            | 0.00±0.00 (0.00)                | 0.83±0.83 (45.45)   | 1.00±1.00 (54.55)                                 | 1.83±1.83    |
| LC              | 30.50±6.56 (26.75)              | 38.00±5.03 (34.85)  | 41.67±7.40 (38.40)                                | 110.17±16.45 |
| LDTg            | 10.00±2.98 (22.25)              | 13.33±1.91 (31.88*) | 18.67±2.11 (45.87* <sup>#</sup> )                 | 42.00±6.35   |
| LPBC            | 13.67±3.51 (36.56)              | 10.00±2.32 (31.50)  | 9.50±2.69 (31.94)                                 | 33.17±7.15   |
| LPBD            | 2.17±0.95 (29.53)               | 2.50±1.02 (35.84)   | 2.50±1.20 (34.63)                                 | 7.17±3.07    |
| LPBV            | 0.17±0.17 (4.17)                | 0.67±0.49 (29.17)   | 1.00±0.63 (66.64)                                 | 1.83±1.28    |
| mlf             | 7.83±2.27 (21.22)               | 13.33±1.23 (37.76*) | 14.50±1.95 (41.02*)                               | 35.67±2.95   |
| Mo5             | 2.17±1.97 (35.58)               | 1.67±1.48 (29.81)   | 1.17±0.83 (34.61)                                 | 5.00±4.25    |
| MPB             | 0.17±0.17 (12.50)               | 0.33±0.21 (29.17)   | 0.83±0.40 (58.33)                                 | 1.33±0.71    |
| PBP             | 0.50±0.50 (15.00)               | 1.17±1.17 (35.00)   | 1.67±1.67 (50.00)                                 | 3.33±3.33    |
| PnC             | 15.00±3.70 (36.10) <sup>#</sup> | 11.67±2.62 (28.43)  | 14.83±4.28 (35.47) <sup>#</sup>                   | 41.50±10.41  |
| PnO             | 42.33±8.76 (37.33) <sup>#</sup> | 25.00±4.58 (23.07)  | 43.67±9.35 (39.60) <sup>#</sup>                   | 111.00±21.32 |
| PnV             | 0.17±0.17 (10.18)               | 0.50±0.34 (29.94)   | 1.00±0.63 (59.88)                                 | 1.67±0.84    |
| PPTg            | 3.33±1.26 (23.91)               | 3.50±1.09 (26.31)   | 6.50±2.03 (49.78)                                 | 13.33±3.79   |
| Pr5             | 2.00±2.00 (31.58)               | 1.17±1.17 (18.42)   | 3.17±3.17 (50.00)                                 | 6.33±6.33    |
| rs              | 6.50±1.12 (25.14)               | 6.67±1.41 (24.76)   | 14.00±3.59 (50.10) <sup>#</sup>                   | 27.17±5.86   |
| SubCD           | 15.00±3.33 (33.90)              | 11.33±2.11 (26.27)  | 16.17±2.46 (39.83) <sup>#</sup>                   | 42.50±7.15   |
| SubCV           | 28.33±5.00 (41.66)              | 15.17±2.30 (20.80)  | 23.67±3.81 (37.54)                                | 67.17±9.60   |
| <b>Midbrain</b> |                                 |                     |                                                   |              |
| 3PC             | 1.67±1.48 (23.29)               | 1.50±0.96 (20.92)   | 4.00±1.61 (55.79* <sup>#</sup> )                  | 7.17±3.96    |
| CnF             | 1.50±0.62 (21.35)               | 1.33±0.49 (19.35)   | 2.83±0.98 (59.30)                                 | 5.67±1.86    |
| DpMe            | 25.00±2.29 (22.78)              | 33.50±2.05 (30.21)  | 54.17±7.90* <sup>#</sup> (47.01* <sup>#</sup> )   | 112.67±9.64  |
| DRD             | 2.00±1.44 (24.41)               | 2.50±1.52 (30.29)   | 4.17±2.54 (45.30)                                 | 8.67±5.39    |
| DRI             | 0.67±0.33 (10.25)               | 1.17±0.17 (21.28)   | 5.50±1.48* <sup>#</sup> (68.47* <sup>#</sup> )    | 7.33±1.52    |
| KF              | 2.67±1.26 (34.72)               | 2.33±0.99 (34.72)   | 1.67±0.67 (30.56)                                 | 6.67±2.82    |
| ml              | 0.50±0.50 (27.27)               | 0.67±0.67 (36.36)   | 0.67±0.67 (36.37)                                 | 1.83±1.83    |
| PAG region      | 65.00±7.68 (23.04)              | 92.17±8.22 (32.14)  | 130.67±17.99* (44.82* <sup>#</sup> )              | 287.83±18.29 |
| DLPAG           | 0.67±0.21 (6.55)                | 2.33±1.05 (20.34)   | 5.83±1.05* <sup>#</sup> (73.11* <sup>#</sup> )    | 8.83±1.70    |

|                        |                    |                      |                                                 |             |
|------------------------|--------------------|----------------------|-------------------------------------------------|-------------|
| DMPAG                  | 5.33±1.52 (12.98)  | 16.83±2.93* (42.81*) | 18.50±3.69* (44.21*)                            | 40.67±5.21  |
| LPAG                   | 22.83±2.60 (23.87) | 32.50±2.69 (32.91)   | 44.50±7.97* (43.22*)                            | 99.83±8.38  |
| PAG                    | 15.83±2.81 (25.43) | 13.50±1.52 (23.96)   | 19.67±2.68 (50.61)                              | 49.00±4.88  |
| VLPAG                  | 20.33±4.14 (23.05) | 27.00±3.53 (30.35)   | 42.17±6.88* (46.60*)                            | 89.50±10.90 |
| PN                     | 0.50±0.50 (42.86)  | 0.17±0.17 (14.29)    | 0.50±0.50 (42.85)                               | 1.17±1.17   |
| R                      | 0.17±0.17 (5.56)   | 1.00±0.63 (31.67)    | 2.00±1.29 (62.77)                               | 3.17±2.01   |
| RC                     | 1.50±0.50 (23.65)  | 3.00±1.03 (38.75)    | 3.50±1.43 (37.60)                               | 8.00±2.80   |
| Su3                    | 1.83±0.75 (11.53)  | 2.50±0.76 (39.27)    | 6.17±2.01 (49.20*)                              | 10.50±3.37  |
| Su3C                   | 1.67±0.76 (20.11)  | 2.33±0.84 (28.90)    | 4.67±2.16 (50.99)                               | 8.67±3.31   |
| VLtg                   | 1.50±0.96 (22.33)  | 1.67±0.76 (25.75)    | 4.33±2.85 (51.92)                               | 7.50±3.96   |
| RMC                    | 0.33±0.33 (15.38)  | 0.67±0.67 (30.77)    | 1.17±1.17 (53.85)                               | 2.17±2.17   |
| VTA                    | 10.83±2.17 (25.69) | 10.67±1.65 (26.48)   | 20.33±3.75* <sup>#</sup> (47.83* <sup>#</sup> ) | 41.83±6.49  |
| <b>Forebrain</b>       |                    |                      |                                                 |             |
| <i>Other forebrain</i> |                    |                      |                                                 |             |
| BSTMA                  | 0.00±0.00 (0.00)   | 0.00±0.00 (0.00)     | 0.33±0.33 (100.00)                              | 0.33±0.33   |
| BSTMV                  | 1.33±0.56 (24.79)  | 1.33±0.56 (29.24)    | 3.00±1.59 (45.97)                               | 5.67±2.01   |
| BSTMPL                 | 0.33±0.33 (13.33)  | 0.83±0.83 (33.33)    | 1.33±1.33 (53.34)                               | 2.50±2.50   |
| LSV                    | 0.50±0.50 (60.24)  | 0.00±0.00 (0.00)     | 0.33±0.21 (39.76)                               | 0.83±0.65   |
| MS                     | 0.50±0.50 (37.59)  | 0.50±0.50 (37.59)    | 0.33±0.21 (24.82)                               | 1.33±1.15   |
| VP                     | 0.67±0.33 (12.55)  | 2.00±0.82 (37.45)    | 2.67±0.80 (50.00*)                              | 5.33±1.86   |
| <i>Preoptic area</i>   |                    |                      |                                                 |             |
| AVPe                   | 2.67±0.88 (26.11)  | 3.33±1.45 (27.78)    | 6.00±2.63 (46.11)                               | 12.00±4.65  |
| HDB                    | 0.00±0.00 (0.00)   | 0.00±0.00 (0.00)     | 0.33±0.33 (100.00)                              | 0.33±0.33   |
| LPO                    | 4.83±0.70 (14.80)  | 9.17±1.58 (25.21*)   | 24.17±6.57* <sup>#</sup> (59.99* <sup>#</sup> ) | 38.17±8.12  |
| LSI                    | 0.00±0.00 (0.00)   | 0.00±0.00 (0.00)     | 0.50±0.50 (100.00)                              | 0.50±0.50   |
| MnPO                   | 2.50±1.38 (24.18)  | 3.17±0.98 (30.66)    | 4.67±1.65 (45.16*)                              | 10.33±3.48  |
| MPOL                   | 1.33±0.42 (16.47)  | 3.00±0.73 (37.34*)   | 3.67±0.95 (46.19*)                              | 8.00±1.86   |
| MPOM                   | 6.50±1.96 (14.80)  | 12.33±2.68 (36.63)   | 18.00±4.47 (48.57)                              | 36.83±8.05  |
| SI                     | 1.67±0.92 (18.40)  | 2.33±0.92 (25.50)    | 4.83±2.14 (56.10)                               | 8.83±3.22   |
| VMPO                   | 1.33±0.80 (39.17)  | 0.67±0.33 (26.67)    | 0.83±0.31 (34.16)                               | 2.83±1.01   |
| VOLT                   | 0.00±0.00 (0.00)   | 0.17±0.17 (20.24)    | 0.67±0.49 (79.76)                               | 0.83±0.65   |
| <i>Hypothalamus</i>    |                    |                      |                                                 |             |
| AHA                    | 4.17±1.76 (19.21)  | 4.67±1.91 (28.53)    | 9.17±3.59 (52.26*)                              | 18.00±7.18  |
| AHC                    | 0.83±0.31 (22.22)  | 0.83±0.17 (23.61)    | 1.67±0.21* <sup>#</sup> (54.17* <sup>#</sup> )  | 3.33±0.33   |
| AHP                    | 6.33±0.95 (27.54)  | 8.00±1.75 (32.35)    | 10.83±2.77 (40.11)                              | 25.17±4.70  |
| Arc                    | 0.33±0.21 (14.17)  | 1.00±0.63 (21.67)    | 3.50±1.93 (64.16)                               | 4.83±2.54   |
| ArcL                   | 0.50±0.34 (17.86)  | 0.83±0.48 (39.29)    | 0.83±0.40 (42.85)                               | 2.17±1.17   |
| ArcLP                  | 0.50±0.22 (16.67)  | 0.67±0.21 (19.44)    | 2.33±0.67* <sup>#</sup> (63.89* <sup>#</sup> )  | 3.50±0.50   |
| ArcMP                  | 1.17±0.54 (18.00)  | 1.33±0.61 (20.46)    | 4.00±1.57 (61.54)                               | 6.50±2.49   |
| DM                     | 11.33±4.30 (17.57) | 15.00±3.54 (27.06)   | 29.17±5.56* (55.37*)                            | 55.50±11.94 |
| DMC                    | 3.00±1.46 (20.22)  | 4.67±1.86 (31.47)    | 7.17±3.40 (48.31)                               | 14.83±6.58  |
| DMD                    | 2.33±1.50 (26.98)  | 2.33±1.12 (33.93)    | 2.50±1.23 (39.09)                               | 7.17±3.62   |
| DMV                    | 2.33±1.61 (15.75)  | 3.00±1.55 (27.65)    | 7.67±5.07 (56.60)                               | 13.00±8.12  |

|                 |                      |                     |                                                   |              |
|-----------------|----------------------|---------------------|---------------------------------------------------|--------------|
| DTM             | 0.50±0.50 (15.00)    | 0.67±0.49 (40.00)   | 0.83±0.65 (45.00)                                 | 2.00±1.63    |
| LA              | 3.17±1.22 (11.47)    | 4.83±2.56 (15.71)   | 13.33±5.00 (72.82* <sup>#</sup> )                 | 21.33±8.47   |
| LH              | 51.50±4.86 (22.71)   | 56.00±5.49 (24.39)  | 125.83±19.74* <sup>#</sup> (52.90* <sup>#</sup> ) | 233.33±22.07 |
| MPA             | 19.33±7.46 (20.28)   | 21.83±3.66 (24.18)  | 47.83±6.44* <sup>#</sup> (55.54* <sup>#</sup> )   | 89.00±13.07  |
| PVH region      | 106.83±15.00 (35.58) | 99.67±11.19 (33.40) | 93.67±12.29 (31.02)                               | 300.17±28.78 |
| PaAP            | 7.67±1.86 (42.46)    | 5.50±0.56 (32.66)   | 4.00±0.73 (24.88)                                 | 17.17±2.24   |
| PaLM            | 18.17±2.74 (38.02)   | 17.33±2.74 (35.36)  | 14.00±3.03 (26.62)                                | 49.50±8.16   |
| PaMM            | 19.17±3.77 (35.76)   | 16.83±2.65 (33.09)  | 16.67±3.44 (31.15)                                | 52.67±9.10   |
| PaMP            | 27.33±7.05 (35.85)   | 24.33±4.17 (36.07)  | 20.17±3.77 (28.08)                                | 71.83±12.23  |
| PaPo            | 28.67±3.90 (31.33)   | 30.17±4.25 (31.77)  | 34.83±4.25 (36.90)                                | 93.67±5.62   |
| PaV             | 5.83±1.47 (36.63)    | 5.50±1.28 (35.41)   | 4.00±0.93 (27.96)                                 | 15.33±3.47   |
| PH              | 12.17±5.16 (27.45)   | 11.83±3.75 (31.45)  | 21.33±12.12 (41.10)                               | 45.33±20.86  |
| PMD             | 0.00±0.00 (0.00)     | 0.50±0.34 (32.50)   | 1.00±0.63 (67.50)                                 | 1.50±0.96    |
| PMV             | 1.00±0.52 (13.90)    | 1.17±0.48 (34.30)   | 2.50±0.96 (51.80)                                 | 4.67±1.84    |
| SCh             | 1.17±0.48 (19.35)    | 2.83±1.64 (37.40)   | 3.17±1.45 (43.25)                                 | 7.17±3.45    |
| SChDM           | 0.33±0.33 (3.33)     | 1.17±0.60 (22.00)   | 2.33±1.02 (74.67* <sup>#</sup> )                  | 3.83±1.82    |
| SChVL           | 0.83±0.83 (7.94)     | 2.67±1.54 (45.87)   | 2.33±0.99 (46.19* <sup>#</sup> )                  | 5.83±3.24    |
| TC              | 13.00±2.03 (22.65)   | 16.50±1.59 (29.18)  | 28.33±4.80* <sup>#</sup> (48.17* <sup>#</sup> )   | 57.83±2.87   |
| VMHC            | 0.00±0.00 (0.00)     | 0.00±0.00 (0.00)    | 0.33±0.21 (100.00)                                | 0.33±0.21    |
| VMHDM           | 0.00±0.00 (0.00)     | 0.00±0.00 (0.00)    | 1.33±0.49 (100.00)                                | 1.33±0.49    |
| VMHVL           | 0.00±0.00 (0.00)     | 0.17±0.17 (10.00)   | 1.67±0.33* <sup>#</sup> (90.00* <sup>#</sup> )    | 1.83±0.31    |
| <i>Thalamus</i> |                      |                     |                                                   |              |
| LHbL            | 0.67±0.33 (10.65)    | 1.83±0.79 (37.56)   | 2.67±1.09 (51.79)                                 | 5.17±2.14    |
| LHbM            | 0.17±0.17 (3.33)     | 1.33±0.49 (33.33)   | 2.17±0.87 (63.34* <sup>#</sup> )                  | 3.67±1.36    |
| PrC             | 1.17±0.79 (14.48)    | 1.33±0.49 (20.19)   | 3.33±1.12 (65.33* <sup>#</sup> )                  | 5.83±2.12    |
| pv              | 3.00±1.21 (39.16)    | 1.33±0.80 (17.36)   | 2.17±1.25 (43.48)                                 | 6.50±3.14    |
| SPF             | 0.67±0.49 (30.88)    | 0.83±0.54 (38.25)   | 0.67±0.67 (30.87)                                 | 2.17±1.64    |
| ZI              | 0.83±0.83 (45.36)    | 0.67±0.67 (36.61)   | 0.33±0.33 (18.03)                                 | 1.83±1.83    |
| ME              | 0.17±0.17 (12.50)    | 0.33±0.33 (25.00)   | 0.83±0.83 (62.50)                                 | 1.33±1.33    |

Data are expressed as means ± SEM (n=6)

\* $p < 0.05$  vs. H129, <sup>#</sup> $p < 0.05$  vs. PRV152

10N, dorsal motor nucleus of vagus; 12n, root of hypoglossal nerve; 3PC, oculomotor nucleus; 7N, facial nucleus; A5, noradrenaline cells; AHA, anterior hypothalamic area, anterior part; AHC, anterior hypothalamic area, central part; AHP, anterior hypothalamic area, posterior part; AP, area postrema; Arc, arcuate hypothalamic nucleus; ArcL, arcuate hypothalamic nucleus, lateral part; ArcLP, arcuate hypothalamic nucleus, lateroposterior part; ArcMP, arcuate hypothalamic nucleus, medial posterior part; AVPe, anteroventral periventricular nucleus; BSTMA, bed nucleus of the stria terminalis, medial division, anterior part; BSTMV, bed nucleus of stria terminalis, medial division, ventral part; BSTMPL, bed nucleus of the stria terminalis, medial division, posterolateral part; CGPn, central gray of the pons; CnF, cuneiform nucleus; DLPAG, dorsolateral periaqueductal gray; DM, dorsomedial hypothalamic nucleus; DMC, dorsomedial hypothalamic nucleus, compact part; DMD, dorsomedial hypothalamic nucleus, dorsal part; DMPAG, dorsomedial periaqueductal gray; DMTg, dorsomedial tegmental area; DMV, dorsomedial hypothalamic nucleus, ventral part; DPGi, dorsal paragigantocellular nucleus; DpMe, deep mesencephalic nucleus; DRD, dorsal raphe nucleus, dorsal part; DRI, dorsal raphe nucleus, interfascicular part; DRVL, dorsal raphe nucleus, ventrolateral part; DTM, dorsal tuberomammillary nucleus; Gi, gigantocellular reticular nucleus; GiA, gigantocellular reticular nucleus, alpha part; GiV, gigantocellular reticular nucleus, ventral part; HDB, nucleus of the horizontal limb of the diagonal band; IOBe, inferior olive, beta subnucleus; IOC, inferior olive, subnucleus C of medial nucleus; IOD, inferior olive, dorsal nucleus; IOK, inferior olive, cap of Kooy of the medial nucleus; IOM, inferior olive, medial nucleus; IOPr, inferior olive, principal nucleus; IRt, intermediate reticular nucleus; KF, Kölliker-Fuse nucleus; LA, lateroanterior hypothalamic nucleus; LC, locus coeruleus; LDTg, laterodorsal tegmental nucleus; LH, lateral hypothalamic area; LHbL, lateral habenular

nucleus, lateral part; LHbM, lateral habenular nucleus, medial part; LPAG, lateral periaqueductal gray; LPBC, lateral parabrachial nucleus, central part; LPBD, lateral parabrachial nucleus, dorsal part; LPBV, lateral parabrachial nucleus, ventral part; LPGi, lateral paragigantocellular nucleus; LPO, lateral preoptic area; LRt, lateral reticular nucleus; LRtPC, lateral reticular nucleus, parvicellular part; LSI, lateral septal nucleus, intermediate part; LSV, lateral septal nucleus, ventral part; MdD, medullary reticular nucleus, dorsal part; MdV, medullary reticular nucleus, ventral part; ME, median eminence; ml, medial lemniscus; mlf, medial longitudinal fasciculus; MnPO, median preoptic nucleus; Mo5, motor trigeminal nucleus; MPA, medial preoptic area; MPB, medial parabrachial nucleus; MPOL, medial preoptic nucleus, lateral part; MPOM, medial preoptic nucleus, medial part; MS, medial septal nucleus; MVeMC, medial vestibular nucleus, magnocellular part; MVePC, medial vestibular nucleus, parvicellular part; NTS, nucleus of the solitary tract; PaAP, paraventricular hypothalamic nucleus, anterior parvicellular part; PAG, periaqueductal gray; PaLM, paraventricular hypothalamic nucleus, lateral magnocellular part; PaMM, paraventricular hypothalamic nucleus, medial magnocellular part; PaMP, paraventricular hypothalamic nucleus, medial parvicellular part; PaPo, paraventricular hypothalamic nucleus, posterior part; PaV, paraventricular hypothalamic nucleus, ventral part; PBP, parabrachial pigmented nucleus; PCRt, parvicellular reticular nucleus; PCRtA, parvicellular reticular nucleus, alpha part; PH, posterior hypothalamic area; PMn, paramedian reticular nucleus; PMD, premammillary nucleus, dorsal part; PMV, premammillary nucleus, ventral part; PN, paranigral nucleus; PnC, pontine reticular nucleus, caudal part; PnO, pontine reticular nucleus, oral part; PnV, pontine reticular nucleus, ventral part; PPTg, pedunculopontine tegmental nucleus; Pr, prepositus nucleus; Pr5, principal sensory trigeminal nucleus; PrC, precommissural nucleus; PSol, parasolitary nucleus; pv, periventricular fiber system; PVH, paraventricular hypothalamic nucleus; R, red nucleus; RC, raphe cap; RMC, red nucleus, magnocellular part; RMg, raphe magnus nucleus; ROb, raphe obscurus nucleus; RPa, raphe pallidus nucleus; rs, rubrospinal tract; RVL, rostroventrolateral reticular nucleus; SCh, suprachiasmatic nucleus; SChDM, suprachiasmatic nucleus, dorsomedial part; SChVL, suprachiasmatic nucleus, ventrolateral part; SI, substantia innominata; SolC, nucleus of the solitary tract, commissural part; SolCe, nucleus of the solitary tract, central part; SolDL, solitary nucleus, dorsolateral part; SolDM, nucleus of the solitary tract, dorsomedial part; SolG, nucleus of the solitary tract, gelatinous part; SolI, nucleus of the solitary tract, interstitial part; SolIM, nucleus of the solitary tract, intermediate part; SolM, nucleus of the solitary tract, medial part; SolV, solitary nucleus, ventral part; SolVL, nucleus of the solitary tract, ventrolateral part; sp5, spinal trigeminal tract; Sp5C, spinal trigeminal nucleus, caudal part; Sp5I, spinal trigeminal nucleus, interpolar part; Sp5O, spinal trigeminal nucleus, oral part; SPF, subparafascicular thalamic nucleus; SpVe, spinal vestibular nucleus; Su3, supraoculomotor periaqueductal gray; Su3C, supraoculomotor cap; SubCD, subcoeruleus nucleus, dorsal part; SubCV, subcoeruleus nucleus, ventral part; TC, tuber cinereum area; VLPAG, ventrolateral periaqueductal gray; VLTg, ventrolateral tegmental area; VMHC, ventromedial hypothalamic nucleus, central part; VMHDM, ventromedial hypothalamic nucleus, dorsomedial part; VMHVL, ventromedial hypothalamic nucleus, ventrolateral part; VMPO, ventromedial preoptic nucleus; VOLT, vascular organ of the lamina terminalis; VP, ventral pallidum; vsc, ventral spinocerebellar tract; VTA, ventral tegmental area; ZI, zona incerta
